# Supplementary material for: Theoretical and experimental mechanistic study of water molecule involvement in the Prilezhaev reaction
Source: Royal Society of Chemistry journal article supplement (doi:10.1039/d3cp00820g), 2023-01-01
Supplement: d3cp00820g1.pdf [file d3cp00820g1.pdf]

*Electronic supplementary information (ESI)*

# Theoretical and experimental mechanistic study of water molecule involvement in the Prilezhaev reaction

*Eri Maeyama Kawahara,<sup>a</sup> Mitsuhiro Ogawa,<sup>a</sup> Shiho Yamato,<sup>a</sup> Toru Yamaguchi,<sup>b</sup> Kenji Hori <sup>a,b</sup> and*

*Michinori Sumimoto <sup>\*a</sup>*

*<sup>a</sup> Division of Materials Science, Graduate School of Science and Technology for Innovation,*

*Yamaguchi, 7558611, Japan, <sup>b</sup> Transition State Technology Company Limited, 7558611, Japan.*

*Cartesian coordinates of all structures calculated at the B3PW91 functional*

|                  |   |
|------------------|---|
| Reactant(1mCPBA) | 2 |
| TS(1mCPBA)       | 2 |
| Product(1mCPBA)  | 2 |
| Reactant(2mCPBA) | 2 |
| TS(2mCPBA)       | 3 |
| Product(2mCPBA)  | 3 |
| Reactant(1W)     | 4 |
| TS(1W)           | 4 |
| Product(1W)      | 4 |
| Reactant(2W)     | 5 |
| TS(2W)           | 5 |
| Product(2W)      | 6 |

**Reactant(1mCPBA)**

|    |             |             |             |
|----|-------------|-------------|-------------|
| C  | 0.28728600  | 1.98960300  | 3.94068500  |
| H  | 1.36842300  | 2.06919400  | 3.96640600  |
| H  | -0.26812700 | 2.91683500  | 4.03763100  |
| C  | -0.30587600 | 0.79847200  | 3.80784300  |
| H  | 0.33025100  | -0.08075300 | 3.72303400  |
| O  | 0.23742500  | 2.51378600  | 0.71172700  |
| H  | 0.31730900  | 1.70150200  | 1.26299300  |
| O  | 0.46851900  | 2.01671200  | -0.59914500 |
| C  | 0.76324000  | 0.70172300  | -0.59514400 |
| O  | 0.80163600  | 0.05857700  | 0.42846200  |
| C  | 1.01606600  | 0.18795100  | -1.96171500 |
| C  | 0.98896100  | 1.01012800  | -3.09060100 |
| C  | 1.23639600  | 0.45940300  | -4.34100600 |
| C  | 1.50852500  | -0.89825100 | -4.47625500 |
| C  | 1.53187600  | -1.70339900 | -3.34174400 |
| C  | 1.28923000  | -1.17556900 | -2.08303800 |
| H  | 0.77713000  | 2.06690800  | -2.98766000 |
| H  | 1.21825800  | 1.08995500  | -5.22309100 |
| H  | 1.70165400  | -1.33202800 | -5.45029000 |
| Cl | 1.87221400  | -3.40464400 | -3.50567600 |
| H  | 1.30709400  | -1.79987100 | -1.19838200 |
| C  | -1.74618200 | 0.51518200  | 3.76884300  |
| C  | -2.16730300 | -0.81847100 | 3.69451300  |
| C  | -2.72733400 | 1.51626900  | 3.80943500  |
| C  | -3.51813500 | -1.14639800 | 3.66819400  |
| H  | -1.42051100 | -1.60614200 | 3.65680900  |
| C  | -4.07559700 | 1.19118800  | 3.78111800  |
| H  | -2.43488100 | 2.55974400  | 3.85766800  |
| C  | -4.47846900 | -0.14184200 | 3.71201400  |
| H  | -3.81996200 | -2.18724200 | 3.61172300  |
| H  | -4.81921500 | 1.98112500  | 3.81130800  |
| H  | -5.53399900 | -0.39229300 | 3.69019700  |

**TS(1mCPBA)**

|   |             |             |             |
|---|-------------|-------------|-------------|
| C | -2.80130700 | -0.37698900 | 2.31512000  |
| H | -2.26866900 | -0.93542100 | 3.07477700  |
| H | -3.14362500 | 0.60818000  | 2.60327300  |
| C | -3.30071700 | -1.02407600 | 1.21658000  |
| H | -3.00088800 | -2.05966000 | 1.06672100  |
| O | -1.29076400 | 0.24347300  | 1.23696500  |
| H | -0.83212100 | -0.63214200 | 1.13356000  |
| O | 0.24489700  | 1.00853500  | 0.76653300  |
| C | 1.07340000  | 0.02710200  | 0.58737600  |
| O | 0.77400500  | -1.15902400 | 0.73213900  |
| C | 2.45311100  | 0.44864600  | 0.17917700  |
| C | 2.79157000  | 1.79174200  | 0.01177100  |
| C | 4.08322300  | 2.13214100  | -0.37044600 |
| C | 5.04020300  | 1.14543200  | -0.58624100 |
| C | 4.68621000  | -0.18867900 | -0.41419000 |
| C | 3.40277000  | -0.55064300 | -0.03415300 |
| H | 2.04180100  | 2.55489100  | 0.18099600  |
| H | 4.35347600  | 3.17431300  | -0.50313700 |

|    |             |             |             |
|----|-------------|-------------|-------------|
| H  | 6.04956000  | 1.40339600  | -0.88442600 |
| Cl | 5.88360200  | -1.43193100 | -0.68252500 |
| H  | 3.12345500  | -1.58825400 | 0.09945800  |
| C  | -4.18248100 | -0.47949600 | 0.20241500  |
| C  | -4.64336100 | -1.33047300 | -0.81492400 |
| C  | -4.60547300 | 0.86035900  | 0.19654400  |
| C  | -5.50830100 | -0.86658300 | -1.79633900 |
| H  | -4.31592300 | -2.36577500 | -0.82774400 |
| C  | -5.46416900 | 1.32306100  | -0.78665300 |
| H  | -4.24413500 | 1.54583100  | 0.95447600  |
| C  | -5.92171800 | 0.46200400  | -1.78465400 |
| H  | -5.85588400 | -1.53916400 | -2.57321600 |
| H  | -5.77711400 | 2.36181900  | -0.78245100 |
| H  | -6.59402700 | 0.82965400  | -2.55276300 |

**Product(1mCPBA)**

|    |             |             |             |
|----|-------------|-------------|-------------|
| C  | -1.42394100 | 2.41482800  | 1.78446400  |
| H  | -0.55306000 | 2.84532900  | 1.29790200  |
| H  | -2.15385700 | 3.10417300  | 2.20019300  |
| C  | -1.32183100 | 1.06142200  | 2.34767600  |
| H  | -0.36110900 | 0.56743200  | 2.21968200  |
| O  | -2.00255100 | 1.29498800  | 1.09789000  |
| H  | -1.23830700 | 0.74623600  | -0.33290500 |
| O  | 1.04095100  | 0.97667600  | -0.00093700 |
| C  | 0.52028400  | 0.54658000  | -1.01042700 |
| O  | -0.79620300 | 0.42960500  | -1.16213800 |
| C  | 1.29577800  | 0.09867400  | -2.20220700 |
| C  | 2.68801300  | 0.17713900  | -2.15666300 |
| C  | 3.43909100  | -0.23227100 | -3.24999800 |
| C  | 2.81224800  | -0.72110900 | -4.39252300 |
| C  | 1.42380000  | -0.79368400 | -4.42444800 |
| C  | 0.65496000  | -0.38958200 | -3.34243700 |
| H  | 3.15895900  | 0.56026700  | -1.25908100 |
| H  | 4.52178300  | -0.17362300 | -3.21991700 |
| H  | 3.39015200  | -1.04327000 | -5.25074400 |
| Cl | 0.63249700  | -1.40586500 | -5.85534100 |
| H  | -0.42487100 | -0.45028000 | -3.37738100 |
| C  | -2.15013500 | 0.60230500  | 3.49200600  |
| C  | -1.52183600 | 0.03209000  | 4.60035800  |
| C  | -3.53909900 | 0.74148500  | 3.49012300  |
| C  | -2.26880900 | -0.37556400 | 5.70057700  |
| H  | -0.44288800 | -0.09356400 | 4.60155600  |
| C  | -4.28468600 | 0.32773400  | 4.58801200  |
| H  | -4.03045200 | 1.15626600  | 2.61635000  |
| C  | -3.65235400 | -0.22767200 | 5.69737800  |
| H  | -1.76994600 | -0.81608100 | 6.55757700  |
| H  | -5.36466100 | 0.43329100  | 4.57526200  |
| H  | -4.23673800 | -0.55114400 | 6.55241200  |

**Reactant(2mCPBA)**

|   |             |            |            |
|---|-------------|------------|------------|
| C | -3.56232800 | 1.21828800 | 2.42246700 |
| H | -2.57241000 | 1.65761100 | 2.46735300 |
| H | -4.15145600 | 1.44959900 | 1.54090000 |

|    |             |             |             |
|----|-------------|-------------|-------------|
| C  | -4.01128100 | 0.43487100  | 3.40613800  |
| H  | -3.35704300 | 0.25867200  | 4.25863200  |
| O  | -1.34158000 | 1.12004200  | -1.26310900 |
| O  | -0.66359900 | 0.85151200  | -2.48149600 |
| C  | 0.45768300  | 1.58097100  | -2.62839900 |
| O  | 0.94906800  | 2.26998100  | -1.76193000 |
| C  | 1.03024700  | 1.41093300  | -3.98780100 |
| C  | 0.38128800  | 0.68774600  | -4.99169300 |
| C  | 0.97253900  | 0.57756400  | -6.24347000 |
| C  | 2.20010400  | 1.17833800  | -6.50264700 |
| C  | 2.83328700  | 1.89618300  | -5.49256700 |
| C  | 2.26182300  | 2.02043100  | -4.23597700 |
| H  | -0.57538900 | 0.22197000  | -4.79268700 |
| H  | 0.47540800  | 0.01957000  | -7.02923500 |
| H  | 2.66485400  | 1.09474100  | -7.47801100 |
| Cl | 4.37043700  | 2.65153600  | -5.81260700 |
| H  | 2.75110800  | 2.58206500  | -3.45005200 |
| C  | -5.31602200 | -0.23374700 | 3.49069800  |
| C  | -5.63668300 | -0.94965600 | 4.65127100  |
| C  | -6.26613800 | -0.19382900 | 2.45977000  |
| C  | -6.85977200 | -1.59765500 | 4.78526000  |
| H  | -4.91257400 | -0.99443100 | 5.45990100  |
| C  | -7.48707900 | -0.83928300 | 2.59125800  |
| H  | -6.04674500 | 0.34372800  | 1.54350000  |
| C  | -7.79184600 | -1.54446900 | 3.75488100  |
| H  | -7.08384400 | -2.14463300 | 5.69549100  |
| H  | -8.20717200 | -0.79591500 | 1.78021800  |
| H  | -8.74735500 | -2.04906200 | 3.85359600  |
| H  | -0.81567200 | 0.60182200  | -0.60589500 |
| O  | 0.37208800  | 2.30434800  | 0.91121000  |
| H  | 0.53354800  | 2.38595000  | -0.06083100 |
| O  | 1.45210300  | 1.48771600  | 1.33897400  |
| C  | 1.26537300  | 0.18359000  | 1.06088000  |
| O  | 0.36785500  | -0.25157500 | 0.37458000  |
| C  | 2.32114100  | -0.65153800 | 1.68765200  |
| C  | 3.30413300  | -0.11768100 | 2.52482100  |
| C  | 2.29254600  | -2.01967800 | 1.40990700  |
| C  | 4.25774100  | -0.96070400 | 3.08021700  |
| H  | 3.31746000  | 0.94344200  | 2.73847200  |
| C  | 3.25416200  | -2.84186300 | 1.97588400  |
| H  | 1.52193600  | -2.41995600 | 0.76300900  |
| C  | 4.24071700  | -2.32522600 | 2.81038900  |
| H  | 5.02395000  | -0.55562900 | 3.73198500  |
| H  | 4.98287700  | -2.98624600 | 3.24235100  |
| Cl | 3.22734100  | -4.55051200 | 1.63676800  |

**TS(2mCPBA)**

|   |             |             |            |
|---|-------------|-------------|------------|
| C | -3.64027000 | 1.53610500  | 5.00944300 |
| H | -2.71356200 | 1.98180000  | 5.34817400 |
| H | -4.30522900 | 2.17001300  | 4.43683100 |
| C | -4.05168100 | 0.34155800  | 5.52823300 |
| H | -3.35234000 | -0.18974400 | 6.17023100 |
| O | -2.90218500 | 0.54000500  | 3.42478000 |
| O | -2.25073200 | 0.10110500  | 1.86036400 |
| C | -1.32228000 | 0.89881600  | 1.44493100 |
| O | -0.69746400 | 1.72615800  | 2.10879700 |

|    |             |             |             |
|----|-------------|-------------|-------------|
| C  | -1.01725000 | 0.72201100  | -0.01787700 |
| C  | -1.80530600 | -0.08177100 | -0.84257500 |
| C  | -1.48618100 | -0.20634400 | -2.18918400 |
| C  | -0.38557900 | 0.45881600  | -2.72006200 |
| C  | 0.39091000  | 1.25433800  | -1.88392500 |
| C  | 0.08851200  | 1.39540300  | -0.53816100 |
| H  | -2.66007500 | -0.59771800 | -0.42324800 |
| H  | -2.09698600 | -0.82655900 | -2.83649700 |
| H  | -0.12987200 | 0.36519400  | -3.76897100 |
| Cl | 1.77355300  | 2.09285700  | -2.54421600 |
| H  | 0.68749900  | 2.01992500  | 0.11260800  |
| C  | -5.32064000 | -0.32505000 | 5.30180500  |
| C  | -5.57636800 | -1.53062700 | 5.97435500  |
| C  | -6.30967100 | 0.18305200  | 4.44305600  |
| C  | -6.78062500 | -2.20060900 | 5.80768100  |
| H  | -4.81669300 | -1.93851500 | 6.63443300  |
| C  | -7.50903300 | -0.48896600 | 4.27346500  |
| H  | -6.13119800 | 1.10092700  | 3.89466900  |
| C  | -7.75103700 | -1.68135600 | 4.95619700  |
| H  | -6.96123300 | -3.12951500 | 6.33816800  |
| H  | -8.26125200 | -0.08673700 | 3.60300000  |
| H  | -8.69222300 | -2.20378500 | 4.82018800  |
| H  | -2.15124800 | 0.13885900  | 3.92177200  |
| O  | -0.38622400 | 2.02052100  | 4.68096600  |
| H  | -0.53500800 | 1.92723000  | 3.69123600  |
| O  | 0.72700900  | 1.17142700  | 4.91108000  |
| C  | 0.38010900  | -0.12067700 | 5.04677000  |
| O  | -0.73221800 | -0.56069900 | 4.86365600  |
| C  | 1.55368700  | -0.94475800 | 5.44097400  |
| C  | 2.78810900  | -0.38395000 | 5.77740100  |
| C  | 1.37350900  | -2.32881900 | 5.46995300  |
| C  | 3.83886500  | -1.21551500 | 6.14272800  |
| H  | 2.91922500  | 0.69035200  | 5.75460400  |
| C  | 2.43645100  | -3.13918000 | 5.83673800  |
| H  | 0.41122900  | -2.74956000 | 5.20622000  |
| C  | 3.67217000  | -2.59618000 | 6.17461700  |
| H  | 4.79999600  | -0.78835500 | 6.40698000  |
| H  | 4.48954700  | -3.24870900 | 6.45812500  |
| Cl | 2.22109500  | -4.86869400 | 5.87510200  |

**Product(2mCPBA)**

|   |             |             |             |
|---|-------------|-------------|-------------|
| C | -2.68872600 | 1.61374400  | 1.90701800  |
| H | -1.64836400 | 1.80549400  | 2.15156000  |
| H | -3.43216700 | 2.31702800  | 2.27341700  |
| C | -3.10841100 | 0.23427200  | 1.62063300  |
| H | -2.32417300 | -0.51697200 | 1.66721000  |
| O | -2.92100300 | 1.18586700  | 0.55350900  |
| O | -1.56389000 | 0.75842100  | -1.68991400 |
| C | -0.42392000 | 1.36435800  | -1.95145600 |
| O | 0.17587400  | 2.07804200  | -1.16181000 |
| C | 0.08614200  | 1.10620100  | -3.32556900 |
| C | -0.60715400 | 0.29512700  | -4.22567800 |
| C | -0.09085800 | 0.08558900  | -5.49837000 |
| C | 1.10787100  | 0.67837600  | -5.88143400 |
| C | 1.78694700  | 1.48525300  | -4.97341500 |

|    |             |             |             |
|----|-------------|-------------|-------------|
| C  | 1.29018400  | 1.70589500  | -3.69861700 |
| H  | -1.54049700 | -0.16273800 | -3.92328600 |
| H  | -0.62311100 | -0.54387000 | -6.20322800 |
| H  | 1.51534700  | 0.51948400  | -6.87293600 |
| Cl | 3.29037200  | 2.23117100  | -5.44956400 |
| H  | 1.81581900  | 2.33417800  | -2.99043900 |
| C  | -4.49377400 | -0.24880100 | 1.85426800  |
| C  | -4.69382500 | -1.39923100 | 2.61906700  |
| C  | -5.60001600 | 0.43113400  | 1.34184700  |
| C  | -5.98151100 | -1.85278500 | 2.88540500  |
| H  | -3.83707300 | -1.94098800 | 3.00940600  |
| C  | -6.88611800 | -0.02699800 | 1.60357700  |
| H  | -5.44373400 | 1.30919900  | 0.72411000  |
| C  | -7.08127300 | -1.16714400 | 2.37880700  |
| H  | -6.12514300 | -2.74668700 | 3.48357100  |
| H  | -7.73980200 | 0.50495100  | 1.19609800  |
| H  | -8.08600600 | -1.52333100 | 2.58108400  |
| H  | -1.91130600 | 0.97644800  | -0.78370200 |
| O  | 0.57434400  | 2.38601600  | 1.48541900  |
| H  | 0.40343300  | 2.30023000  | 0.51554400  |
| O  | 1.70244600  | 1.54310200  | 1.66260000  |
| C  | 1.35671900  | 0.26768800  | 1.97015700  |
| O  | 0.23071500  | -0.15221800 | 1.98974900  |
| C  | 2.57807200  | -0.53509400 | 2.26667600  |
| C  | 3.86317700  | 0.01216600  | 2.27627800  |
| C  | 2.38658800  | -1.88995300 | 2.54243300  |
| C  | 4.95160200  | -0.80218800 | 2.56279100  |
| H  | 4.00567100  | 1.06384600  | 2.06335700  |
| C  | 3.48671700  | -2.68371200 | 2.82631700  |
| H  | 1.38473000  | -2.30073000 | 2.53239500  |
| C  | 4.77296300  | -2.15365900 | 2.83904700  |
| H  | 5.95221400  | -0.38400700 | 2.57266700  |
| H  | 5.61893400  | -2.79265400 | 3.06316900  |
| Cl | 3.25453800  | -4.37726900 | 3.17287300  |

### Reactant(1W)

|    |             |             |             |
|----|-------------|-------------|-------------|
| C  | 4.06078500  | 1.11951300  | 1.51403600  |
| H  | 3.41724700  | 1.90739300  | 1.88805400  |
| H  | 3.67946700  | 0.10728700  | 1.60023400  |
| C  | 5.24882300  | 1.40474800  | 0.97449000  |
| H  | 5.54757300  | 2.45140400  | 0.92153300  |
| O  | -0.38472800 | 0.07962500  | 0.84367900  |
| O  | -1.62846800 | -0.51809800 | 0.50335300  |
| C  | -2.58332700 | 0.36184900  | 0.13227900  |
| O  | -2.38273200 | 1.52473300  | -0.12615700 |
| C  | -3.90699600 | -0.31183800 | 0.04780100  |
| C  | -4.11766300 | -1.61956800 | 0.49174800  |
| C  | -5.38519800 | -2.17876000 | 0.39179800  |
| C  | -6.44112900 | -1.45055200 | -0.14662700 |
| C  | -6.21552700 | -0.14889600 | -0.58362500 |
| C  | -4.95941300 | 0.43016800  | -0.49188900 |
| H  | -3.29809000 | -2.18595600 | 0.91510000  |
| H  | -5.55824700 | -3.19208700 | 0.73733600  |
| H  | -7.43159000 | -1.88303700 | -0.22618000 |
| Cl | -7.53491300 | 0.76950700  | -1.25752500 |
| H  | -4.78369800 | 1.44572500  | -0.82448700 |

|   |             |             |             |
|---|-------------|-------------|-------------|
| C | 6.22787900  | 0.46011400  | 0.42055200  |
| C | 7.40278500  | 0.96275600  | -0.15312100 |
| C | 6.04613600  | -0.93072000 | 0.43558600  |
| C | 8.36112600  | 0.11402000  | -0.69653200 |
| H | 7.56265700  | 2.03708500  | -0.17240800 |
| C | 7.00121300  | -1.77918500 | -0.10530900 |
| H | 5.15023500  | -1.35383800 | 0.87773100  |
| C | 8.16411000  | -1.26204600 | -0.67535900 |
| H | 9.26268000  | 0.52902200  | -1.13575900 |
| H | 6.84057800  | -2.85241900 | -0.08208100 |
| H | 8.90918800  | -1.92883300 | -1.09681100 |
| H | -0.10073000 | 0.54840700  | 0.01894100  |
| H | 0.30018200  | 1.58405400  | -2.16818600 |
| O | 0.18605600  | 1.72784500  | -1.22569900 |
| H | -0.70018500 | 2.09767800  | -1.10235600 |

### TS(1W)

|    |             |             |             |
|----|-------------|-------------|-------------|
| C  | 2.56424300  | 1.34100300  | 1.56444200  |
| H  | 2.02408600  | 2.25365500  | 1.78046600  |
| H  | 2.53049100  | 0.57004800  | 2.32335500  |
| C  | 3.47871500  | 1.31788600  | 0.54875400  |
| H  | 3.51444000  | 2.18747500  | -0.10368500 |
| O  | 1.22535800  | 0.49875600  | 0.36560700  |
| O  | -0.25525300 | -0.27166100 | -0.17382400 |
| C  | -1.31831000 | 0.45151800  | 0.00417300  |
| O  | -1.36360000 | 1.66462800  | 0.19344900  |
| C  | -2.58451200 | -0.36010800 | -0.07013700 |
| C  | -2.56707600 | -1.75441200 | -0.12455600 |
| C  | -3.76506800 | -2.45579500 | -0.18635200 |
| C  | -4.98103200 | -1.77990000 | -0.19881400 |
| C  | -4.98117600 | -0.38990800 | -0.14547700 |
| C  | -3.79755600 | 0.32925800  | -0.08094200 |
| H  | -1.61739500 | -2.27459900 | -0.11499200 |
| H  | -3.75799900 | -3.53991200 | -0.22520000 |
| H  | -5.91915300 | -2.32006800 | -0.24796700 |
| Cl | -6.50444500 | 0.46559500  | -0.15914600 |
| H  | -3.79571700 | 1.41088800  | -0.03161700 |
| C  | 4.40291500  | 0.24718200  | 0.22430500  |
| C  | 5.32956400  | 0.44888300  | -0.81111300 |
| C  | 4.42070300  | -0.98181400 | 0.90506800  |
| C  | 6.25194300  | -0.53272100 | -1.14696600 |
| H  | 5.32213000  | 1.39157500  | -1.35023400 |
| C  | 5.33755400  | -1.96291500 | 0.56493000  |
| H  | 3.70104000  | -1.17474200 | 1.69239200  |
| C  | 6.25867800  | -1.74254700 | -0.45948600 |
| H  | 6.96257900  | -0.35636400 | -1.94749200 |
| H  | 5.33497100  | -2.90900200 | 1.09606200  |
| H  | 6.97490600  | -2.51424900 | -0.72153400 |
| H  | 1.15666600  | 1.28254500  | -0.23444200 |
| H  | 0.62106500  | 3.15380800  | -1.74148000 |
| O  | 0.77491800  | 2.93615200  | -0.81915100 |
| H  | -0.10468000 | 2.70600900  | -0.44517600 |

### Product(1W)

|    |             |             |             |    |             |             |             |
|----|-------------|-------------|-------------|----|-------------|-------------|-------------|
| C  | 3.34339400  | 0.51212000  | 1.74661000  | C1 | 4.65593400  | 3.80544100  | -3.61483600 |
| H  | 2.57463400  | 1.18433200  | 2.12042100  | H  | 2.97189000  | 2.18168400  | -1.96119800 |
| H  | 3.83857900  | -0.11249300 | 2.48567700  | C  | -4.24889900 | -0.64396100 | 4.55881500  |
| C  | 4.06005400  | 0.84015300  | 0.50426500  | C  | -4.41712900 | -1.08902000 | 5.87637300  |
| H  | 3.76671900  | 1.75729200  | -0.00378800 | C  | -5.33520800 | -0.01233100 | 3.93569500  |
| O  | 3.02523600  | -0.15618200 | 0.52281500  | C  | -5.62051900 | -0.91207700 | 6.55044200  |
| O  | -1.71677800 | -0.87448800 | -1.48146100 | H  | -3.58807900 | -1.58215200 | 6.37610800  |
| C  | -2.32981300 | -0.23720600 | -0.64462900 | C  | -6.53665600 | 0.16561400  | 4.60592300  |
| O  | -1.77204700 | 0.68376500  | 0.13194000  | H  | -5.23991600 | 0.34274000  | 2.91514800  |
| C  | -3.78837800 | -0.42367300 | -0.39830500 | C  | -6.68687000 | -0.28315000 | 5.91753800  |
| C  | -4.47614900 | -1.37140900 | -1.15661300 | H  | -5.72467800 | -1.26665200 | 7.57092800  |
| C  | -5.83510300 | -1.56689800 | -0.95086000 | H  | -7.36405000 | 0.65678300  | 4.10352100  |
| C  | -6.51733600 | -0.82364100 | 0.00799400  | H  | -7.62818100 | -0.14294400 | 6.43872100  |
| C  | -5.81908200 | 0.11766900  | 0.75653600  | H  | 2.63541600  | -3.20566400 | 0.72604700  |
| C  | -4.46108200 | 0.32869300  | 0.56609400  | O  | 1.71314300  | -2.95093800 | 0.65469000  |
| H  | -3.92910000 | -1.94056500 | -1.89890800 | H  | 1.58974000  | -2.15738000 | 1.21690200  |
| H  | -6.37445700 | -2.30215500 | -1.53830700 | H  | 0.96099900  | -2.41113600 | -0.75929500 |
| H  | -7.57800200 | -0.96928700 | 0.17568500  | H  | 1.34036000  | 0.17478800  | 2.17534400  |
| C1 | -6.66978600 | 1.05353500  | 1.96120400  | O  | 1.02286200  | -0.50578200 | 1.57811900  |
| H  | -3.92746300 | 1.06477400  | 1.15299700  | H  | 1.00766900  | -0.10467200 | 0.68934800  |
| C  | 5.44765800  | 0.38064700  | 0.23693500  |    |             |             |             |
| C  | 6.41234300  | 1.31274100  | -0.14818200 |    |             |             |             |
| C  | 5.80927400  | -0.96024100 | 0.37783200  |    |             |             |             |
| C  | 7.72626700  | 0.91464700  | -0.37107200 |    |             |             |             |
| H  | 6.13411700  | 2.35506700  | -0.27575500 |    |             |             |             |
| C  | 7.12178900  | -1.35710100 | 0.14981300  |    |             |             |             |
| H  | 5.05275600  | -1.69002800 | 0.64656400  |    |             |             |             |
| C  | 8.08424400  | -0.42144600 | -0.22082800 |    |             |             |             |
| H  | 8.46860000  | 1.64757800  | -0.66932100 |    |             |             |             |
| H  | 7.39346200  | -2.40240400 | 0.25491200  |    |             |             |             |
| H  | 9.10746100  | -0.73458400 | -0.39995200 |    |             |             |             |
| H  | 1.46480900  | 0.19752400  | -0.39341000 |    |             |             |             |
| H  | 0.32754100  | -0.17785700 | -1.39878300 |    |             |             |             |
| O  | 0.67278500  | 0.53817000  | -0.84653600 |    |             |             |             |
| H  | -0.80374400 | 0.74090600  | -0.10818100 |    |             |             |             |

### TS(2W)

### Reactant(2W)

|   |             |             |             |    |             |             |             |
|---|-------------|-------------|-------------|----|-------------|-------------|-------------|
| C | -2.60804100 | -0.50327800 | 2.65601500  | C  | -3.63979800 | 1.03624200  | 4.98174700  |
| H | -1.61619600 | -0.71512400 | 2.27209900  | H  | -2.62379000 | 1.13351000  | 5.34377500  |
| H | -3.29103600 | 0.00451900  | 1.98185600  | H  | -4.08358800 | 1.92801900  | 4.55765700  |
| C | -2.95570400 | -0.85736500 | 3.89600300  | C  | -4.39241900 | -0.05339900 | 5.31831600  |
| H | -2.21306000 | -1.36708600 | 4.50813700  | H  | -3.88191500 | -0.87417100 | 5.81724500  |
| O | 0.40238100  | -1.92793400 | -1.42603900 | O  | -3.22001800 | 0.16857000  | 3.23590300  |
| O | 1.37144200  | -1.40809700 | -2.32486000 | O  | -2.63761500 | -0.13983700 | 1.61390300  |
| C | 1.72546500  | -0.13908800 | -2.03864100 | C  | -1.68349800 | 0.66954800  | 1.27345700  |
| O | 1.42579500  | 0.45591300  | -1.03114100 | O  | -1.00005000 | 1.36935000  | 2.01475800  |
| C | 2.56026900  | 0.42762300  | -3.13275400 | C  | -1.44212000 | 0.67307600  | -0.21463500 |
| C | 2.76112100  | -0.23352800 | -4.34689100 | C  | -2.29561300 | 0.01810900  | -1.10349500 |
| C | 3.54733600  | 0.35976600  | -5.32635800 | C  | -2.03047900 | 0.05543100  | -2.46719400 |
| C | 4.13486400  | 1.60152500  | -5.10813700 | C  | -0.91967300 | 0.73704700  | -2.95405900 |
| C | 3.92411600  | 2.24829100  | -3.89424800 | C  | -0.07858400 | 1.38452800  | -2.05510700 |
| C | 3.14187800  | 1.67594800  | -2.90346500 | C  | -0.32645400 | 1.36202800  | -0.69116200 |
| H | 2.29991300  | -1.19717300 | -4.52127300 | H  | -3.15963900 | -0.50938700 | -0.71889100 |
| H | 3.70475700  | -0.14545200 | -6.27296600 | H  | -2.69284100 | -0.44880200 | -3.16283900 |
| H | 4.74863500  | 2.06815800  | -5.86961000 | H  | -0.70606200 | 0.76993300  | -4.01595700 |
|   |             |             |             | C1 | 1.31745500  | 2.24505900  | -2.65859500 |
|   |             |             |             | H  | 0.32258300  | 1.87271300  | 0.00901700  |
|   |             |             |             | C  | -5.80541000 | -0.25974500 | 5.05631800  |
|   |             |             |             | C  | -6.40601200 | -1.44503200 | 5.50958600  |
|   |             |             |             | C  | -6.60556500 | 0.67549300  | 4.37888000  |
|   |             |             |             | C  | -7.75772500 | -1.68651900 | 5.30478500  |
|   |             |             |             | H  | -5.79755000 | -2.17898400 | 6.02949200  |
|   |             |             |             | C  | -7.95350300 | 0.43177800  | 4.17116600  |
|   |             |             |             | H  | -6.16637000 | 1.59263500  | 4.00311100  |
|   |             |             |             | C  | -8.53627000 | -0.74816000 | 4.63431500  |
|   |             |             |             | H  | -8.20360900 | -2.60771900 | 5.66483200  |
|   |             |             |             | H  | -8.55694000 | 1.16224300  | 3.64242100  |
|   |             |             |             | H  | -9.59255300 | -0.93368400 | 4.46958100  |
|   |             |             |             | H  | -1.05639700 | -2.23907100 | 4.00578300  |
|   |             |             |             | O  | -1.50042100 | -1.55600300 | 4.51365500  |
|   |             |             |             | H  | -0.84946000 | -0.82891500 | 4.62572000  |

|   |             |             |            |
|---|-------------|-------------|------------|
| H | -2.68069800 | -0.57026200 | 3.62078400 |
| H | 0.66026200  | 1.14605700  | 4.63730500 |
| O | -0.23767800 | 0.82173200  | 4.54367200 |
| H | -0.54545300 | 1.10790800  | 3.65134200 |

## Product(2W)

|    |             |             |             |
|----|-------------|-------------|-------------|
| C  | -1.12629600 | 1.01504400  | 2.87368500  |
| H  | -0.07035800 | 1.15316300  | 3.08920700  |
| H  | -1.81211900 | 1.77507400  | 3.23957500  |
| C  | -1.63685000 | -0.34559000 | 2.64534800  |
| H  | -0.90550400 | -1.14993100 | 2.70053500  |
| O  | -1.42038500 | 0.56433700  | 1.54244600  |
| O  | -0.21695700 | 0.29941800  | -0.80951100 |
| C  | 1.07962000  | 0.47350600  | -0.97380100 |
| O  | 1.86914800  | 0.67935400  | -0.06646200 |
| C  | 1.50812100  | 0.39782300  | -2.39857600 |
| C  | 0.59345800  | 0.17113800  | -3.42844200 |
| C  | 1.04033600  | 0.10795500  | -4.74240800 |
| C  | 2.38994500  | 0.26875700  | -5.03881600 |
| C  | 3.28981500  | 0.49456400  | -4.00167200 |
| C  | 2.86451900  | 0.56114400  | -2.68441700 |
| H  | -0.45584500 | 0.04634700  | -3.19286900 |
| H  | 0.33537000  | -0.06810800 | -5.54763800 |
| H  | 2.74506600  | 0.22035200  | -6.06149400 |
| Cl | 4.98400600  | 0.69709000  | -4.36737400 |
| H  | 3.56311700  | 0.73745200  | -1.87618800 |
| C  | -3.04428900 | -0.72382600 | 2.93297700  |
| C  | -3.29145000 | -1.84849800 | 3.72244700  |
| C  | -4.12064500 | 0.02209600  | 2.44937200  |
| C  | -4.59624600 | -2.21081400 | 4.04062900  |
| H  | -2.45642300 | -2.43865800 | 4.08813900  |
| C  | -5.42414800 | -0.34568700 | 2.76305600  |
| H  | -3.92982300 | 0.87908100  | 1.81177100  |
| C  | -5.66592600 | -1.46002200 | 3.56256300  |
| H  | -4.77722500 | -3.08533700 | 4.65715800  |
| H  | -6.25518800 | 0.23623700  | 2.37745900  |
| H  | -6.68419200 | -1.74573100 | 3.80542800  |
| H  | 1.56941200  | -2.87041900 | 2.85809000  |
| O  | 1.05542700  | -2.16639400 | 3.25856200  |
| H  | 1.57170400  | -1.35348600 | 3.10817400  |
| H  | -0.49729000 | 0.38522500  | 0.14058700  |
| H  | 3.09546000  | 0.63817000  | 2.87315900  |
| O  | 2.22182600  | 0.31126300  | 2.64801700  |
| H  | 2.10771100  | 0.48041600  | 1.69291900  |
